# Supplementary material
Source: PubMed Central journal article supplement (PMC3401028)
Supplement: supp_blood-2008-06-162594_TableS1.pdf [file supp_blood-2008-06-162594_TableS1.pdf]

**A**

| gene           | sense                    | antisense                |
|----------------|--------------------------|--------------------------|
| $\beta$ -actin | GGCCCAGAGCAAGAGAGGTATCC  | ACGCACGATTTCCCTCTCAGC    |
| PIAS3          | GGACGTGTCCTGTGTGTGAC     | TGACGTCTGACCGACAGC       |
| c-Fos          | ATGGGCTCTCCTGTCAACAC     | GCAGCCATCTTATTCCGTTC     |
| NFATc1         | TGCTCCTCCTCCTGCTGCTC     | CGTCTTCCACCTCCACGTCG     |
| RANKL          | TATGATGGAAGGCTCATGGT     | TGTCCTGAACTTTGAAAGCC     |
| TRAP           | CAGTTGGCAGCAGCCAAGGAGGAC | GTCCCTCAGGAGTCTAGGTATCAC |
| Cathepsin K    | GGGAGAAAAACCTGAAGC       | ATTCTGGGGACTCAGAGC       |
| MMP9           | ACTACTCTGAAGACTTGCCG     | GGTACAGGAAGAGTACTGCT-    |

**B**

| gene           | sense                  | antisense               |
|----------------|------------------------|-------------------------|
| $\beta$ -actin | CTGAACCCTAAGGCCAACCGTG | GGCATAACAGGGACAGCACAGCC |
| PIAS3          | TTTCGATGCTGCCCTTTATC   | CTCTGATGCCTCCTTCTTGG    |
| c-Fos          | GTCAAGAGCATCAGCAACGTG  | GTAGTGCAGCCCCGGAGTACAG  |
| NFATc1         | CCTTCCCACAGCACACTCTG   | TAGGCCCAGGTAGGAGGTGA    |
| TRAP           | CAGGAGACCTTTGAGGACGTG  | GTGGAATTTTGAAGCGCAAAC   |
| Cathepsin K    | TGGCTCGGAATAAGAACAACG  | GCACCAACGAGAGGAGAAATG   |
| RANKL          | TGTACTTTCGAGCGCAGATG   | CCACAATGTGTTGCAGTTCC    |

**C**

| gene                 | sense                   | antisense              |
|----------------------|-------------------------|------------------------|
| c-Fos promoter       | TCTGCCTTTCCCGCCTCCCC    | GGCCGTGGAAACCTGCTGAC   |
| Cathepsin K promoter | GTGGTTGGCCAAGTCAGACTC   | CTGCTAGACTCTCGGGTGGTAG |
| TRAP promoter        | GGACCTACAGATGCCCAGTACAC | TCCGAGGATTGTCCAGAAGC   |
